# Supplementary material for: Plasma Apolipoprotein CI and CIII Levels Are Associated With Increased Plasma Triglyceride Levels and Decreased Fat Mass in Men With the Metabolic Syndrome
Source: Oxford University Press journal article supplement (doi:10.2337/dc08-1330), 2008-10-04
Supplement: dc08-1330_online_appendix.doc [file dc08-1330_online_appendix.doc]

Online supplement to

Van der Ham et al.: Plasma apolipoprotein CI and CIII levels are associated with increased plasma triglyceride levels and decreased fat mass in men with the metabolic syndrome.

Table A1a - Clinical and laboratory characteristics.

|  | **ApoCI<med and ApoCIII<mean**  **n=35 (group 1)** | **ApoCI>med and ApoCIII<mean n=21 (group 2)** | **ApoCI<med and ApoCIII>mean n=14 (group 3)** | **ApoCI>med and ApoCIII>mean n=28 (group 4)** |
| --- | --- | --- | --- | --- |
| **Age (y)** | 59.4 (5.7) | 60.9 (5.5) | 57.3 (4.5) | 57.6 (4.4) |
| **BMI (kg/m2)** | 31.5 (3.7) | 30.5 (3.9) | 30.3 (3.0) | 29.7 (3.3) |
| **Waist (cm)** | 111.6 (9.6) | 110.7 (11.2) | 107.8 (7.8) | 108.3 (8.4) |
| **Smoking (*)** | 11% 3#, 4# | 0% 3*, 4* | 36% 1#, 2* | 32% 1#, 2* |
| **SBP (mmHg)** | 155 (16) | 158 (20) | 148 (15) | 151 (17) |
| **DBP (mmHg)** | 94 (9) | 90 (9) | 92 (6) | 90 (8) |
| **FBG (mmol/L)** | 5.6 (0.8) | 5.7 (0.8) | 5.3 (0.9) | 5.6 (1.0) |
| **Insulin (μU/ml) §** | 14 (9-20) | 9 (6-24) | 12 (9-19) | 10 (8-15) |
| **HOMA §** | 1.8 (1.3-2.6) | 1.2 (0.8-3.2) | 1.6 (1.2-2.5) | 1.4 (1.1-1.9) |
| **TotChol (mmol/L) (+)** | 5.2 (0.8) 2+, 4+ | 6.1 (0.7) 1+ | 5.7 (0.8) 4# | 6.4 (1.0) 1+, 3# |
| **Calculated LDL (mmol/L)** | 3.3 (0.7) | 3.9 (0.7) | 3.3 (0.6) | 3.6 (1.0) |
| **HDL (mmol/L) (#)** | 1.18 (0.3) 2* | 1.41 (0.3) 1*, 3* | 1.11 (0.3) 2* | 1.30 (0.3) |
| **Triglycerides (mmol/L) (+)** | 1.63 (0.6) 3+, 4+ | 1.87 (0.6) 3*, 4+ | 2.82 (1.0) 1+, 2* | 3.2 (1.1) 1+, 2+ |
| **hsCRP (mg/L) §** | 2.7 (1.6-4.3) | 2.8 (1.6-3.6) | 2.3 (1.6-4.0) | 2.3 (1.1-3.9) |
| **ApoCI (mg/dL) § (+)** | 5.0 (4.3-5.9) 2+, 4+ | 7.7 (7.0-8.5) 1+, 3+ | 5.0 (4.9-5.4) 2+, 4+ | 7.7 (7.0-10.3) 1+, 3+ |
| **ApoCIII (mg/dL) (+)** | 6.7 (1.9) 2*, 3+, 4+ | 8.6 (1.5) 1*, 3+, 4+ | 13.5 (2.5) 1+, 2+ | 14.3 (3.6) 1+, 2+ |
| **VAT (cm2) (*)** | 574 (180) 4+ | 511 (142) | 505 (162) | 426 (133) 1+ |
| **SAT (cm2) §** | 823 (649-1097) | 882 (659-1057) | 664 (599-858) | 767 (625-932) |
| **SAT+VAT (cm2) §** | 1410 (1136-1745) | 1348 (1107-1593) | 1240 (981-1482) | 1160 (984-1534) |

Data are means with SD (in case of normal distribution) or medians with inter quartile range (in case of skewed distribution, indicated by §). Statistical differences are shown by symbols (#=p<0.05, *=p<0.01, +=p<0.001), and accompanying numbers (1-4) refer to the group to which the data in the cell are significantly different.Abbreviations: ApoCI: apolipoprotein CI. ApoCIII: apolipoprotein CIII. BMI: body mass index. DBP: diastolic blood pressure. FBG: fasting blood glucose. hsCRP: high sensitivity C-reactive protein. SAT: subcutaneous adipose tissue area. SAT+VAT: sum of subcutaneous and visceral fat areas. SBP: systolic blood pressure. TotChol: total cholesterol. VAT: visceral adipose tissue area.

Table A1b - Clinical and laboratory characteristics, after exclusion of smokers.

|  | **ApoCI<med and ApoCIII<mean**  **N=31 (group 1)** | **ApoCI>med and ApoCIII<mean n=21 (group 2)** | **ApoCI<med and ApoCIII>mean n=9 (group 3)** | **ApoCI>med and ApoCIII>mean n=19 (group 4)** |
| --- | --- | --- | --- | --- |
| **Age (y)** | 58.9 (5.7) | 60.9 (5.5) | 57.5 (4.8) | 58.3 (4.9) |
| **BMI (kg/m2)** | 31.7 (3.9) | 30.5 (3.9) | 30.6 (2.9) | 29.5 (3.5) |
| **Waist (cm)** | 111.7 (9.9) | 110.7 (11.2) | 107.7 (6.8) | 108.5 (9.0) |
| **SBP (mmHg)** | 155 (16) | 158 (20) | 148 (13) | 153 (17) |
| **DBP (mmHg)** | 95 (8) | 90 (9) | 92 (6) | 91 (6) |
| **FBG (mmol/L)** | 5.6 (0.8) | 5.7 (0.8) | 5.2 (0.8) | 5.5 (1.0) |
| **Insulin (μU/ml) §** | 14 (9-20) | 9 (6-24) | 14 (9-17) | 10 (7-14) |
| **HOMA §** | 1.9 (1.3-2.6) | 1.2 (0.8-3.2) | 1.9 (1.2-2.2) | 1.4 (10.-2.0) |
| **TotChol (mmol/L) (+)** | 5.3 (0.9) 2*, 4+ | 6.1 (0.7) 1* | 5.5 (0.8) 4# | 6.3 (1.0) 1+, 3# |
| **Calculated LDL (mmol/L)** | 3.3 (0.7) | 3.9 (0.7) | 3.1 (0.4) | 3.5 (1.1) |
| **HDL (mmol/L) (*)** | 1.16 (0.3) 2*, 4# | 1.41 (0.3) 1*, 3* | 1.08 (0.32) 2*, 4# | 1.35 (0.3) 1#, 3# |
| **Triglycerides (mmol/L) (+)** | 1.63 (0.6) 3+, 4+ | 1.87 (0.6) 3*, 4+ | 2.81 (1.1) 1+, 2* | 2.96 (1.2) 1+, 2+ |
| **hsCRP (mg/L) §** | 2.7 (1.6-4.3) | 2.8 (1.6-3.6) | 2.9 (1.5-4.4) | 2.3 (1.1-5.0) |
| **ApoCI (mg/dL) § (+)** | 5.0 (4.3-5.9) 2+, 4+ | 7.7 (7.0-8.5) 1+, 3+ | 4.7 (4.4-5.4) 2+, 4+ | 7.3 (6.8-10.4) 1+, 3+ |
| **ApoCIII (mg/dL) (+)** | 6.6 (1.9) 2*, 3+, 4+ | 8.6 (1.5) 1*, 3+, 4+ | 13.3 (2.4) 1+, 2+ | 13.4 (3.2) 1+, 2+ |
| **VAT (cm2) (#)** | 579 (184) 3#, 4* | 511 (142) | 449 (112) 1# | 431 (150) 1* |
| **SAT (cm2) §** | 823 (649-1097) | 882 (659-1057) | 681 (624-994) | 742 (629-977) |
| **SAT+VAT (cm2) §** | 1425 (1136-1816) | 1348 (1107-1593) | 1213 (981-1536) | 1156 (987-1570) |

Data are means with SD (in case of normal distribution) or medians with inter quartile range (in case of skewed distribution, indicated by §). Statistical differences are shown by symbols (#=p<0.05, *=p<0.01, +=p<0.001), and accompanying numbers (1-4) refer to the group to which the data in the cell are significantly different.

Abbreviations: ApoCI: apolipoprotein CI. ApoCIII: apolipoprotein CIII. BMI: body mass index. DBP: diastolic blood pressure. FBG: fasting blood glucose. hsCRP: high sensitivity C-reactive protein. SAT: subcutaneous adipose tissue area. SAT+VAT: sum of subcutaneous and visceral fat areas. SBP: systolic blood pressure. TotChol: total cholesterol. VAT: visceral adipose tissue area.
